# Supplementary figures and images for: A Tumor Growth Inhibition Model Based on M‐Protein Levels in Subjects With Relapsed/Refractory Multiple Myeloma Following Single‐Agent Carfilzomib Use
Source: PubMed Central journal article supplement — CPT Pharmacometrics Syst Pharmacol. 2015 Nov 20;4(12):711–9. doi: 10.1002/psp4.12044 (PMC4759707; doi:10.1002/psp4.12044), 2015-11-20

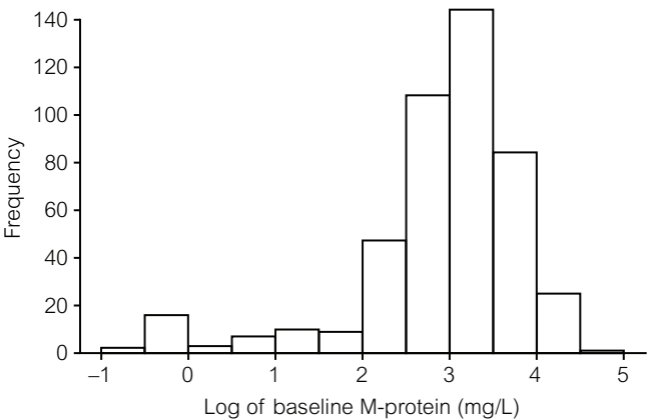

Supplement: PSP4-4-711-s001.pdf [file PSP4-4-711-s001.pdf]
